# Supplementary material for: Realizing highly efficient blue photoluminescence of dimethylsilane-aryl (phenylene, diphenylene, fluorenyl) main-chain polymers with σ–π conjugation
Source: Royal Society of Chemistry journal article supplement (doi:10.1039/d1tc05975k), 2022-01-01
Supplement: d1tc05975k1.pdf [file d1tc05975k1.pdf]

## Supporting Information

### **Realizing highly efficient blue photoluminescence of dimethylsilane-aryl (phenylene, diphenylene, fluorenyl) main-chain polymers with $\sigma$ - $\pi$ conjugation**

*Wenyan Huang<sup>1</sup>, Yeqi Zhu<sup>1</sup>, Lei Zhong<sup>1</sup>, Chao Jin<sup>1</sup>, Yinong Zheng<sup>1</sup>, Yinggan Zhang<sup>1</sup>, Siqu Lan<sup>1</sup>, Shiwen Gong<sup>1</sup>, Jiangnan Zhao<sup>1</sup>, Meng Huang<sup>1</sup>, Rongqian Yao<sup>1\*</sup>*

<sup>1</sup>College of Materials, Fujian Key Laboratory of Advanced Materials (Xiamen University), and Key Laboratory of High Performance Ceramics Fibers (Xiamen University), Ministry of Education, China, Xiamen, Fujian 361005, P. R. China

#### **Corresponding Author**

\*E-mail: rgyao@xmu.edu.cn (R. Yao).

# Contents

**1 Chemical structure**

**2 Photophysical properties**

**3 Electrochemical properties**

**References**

## 1 Chemical structure

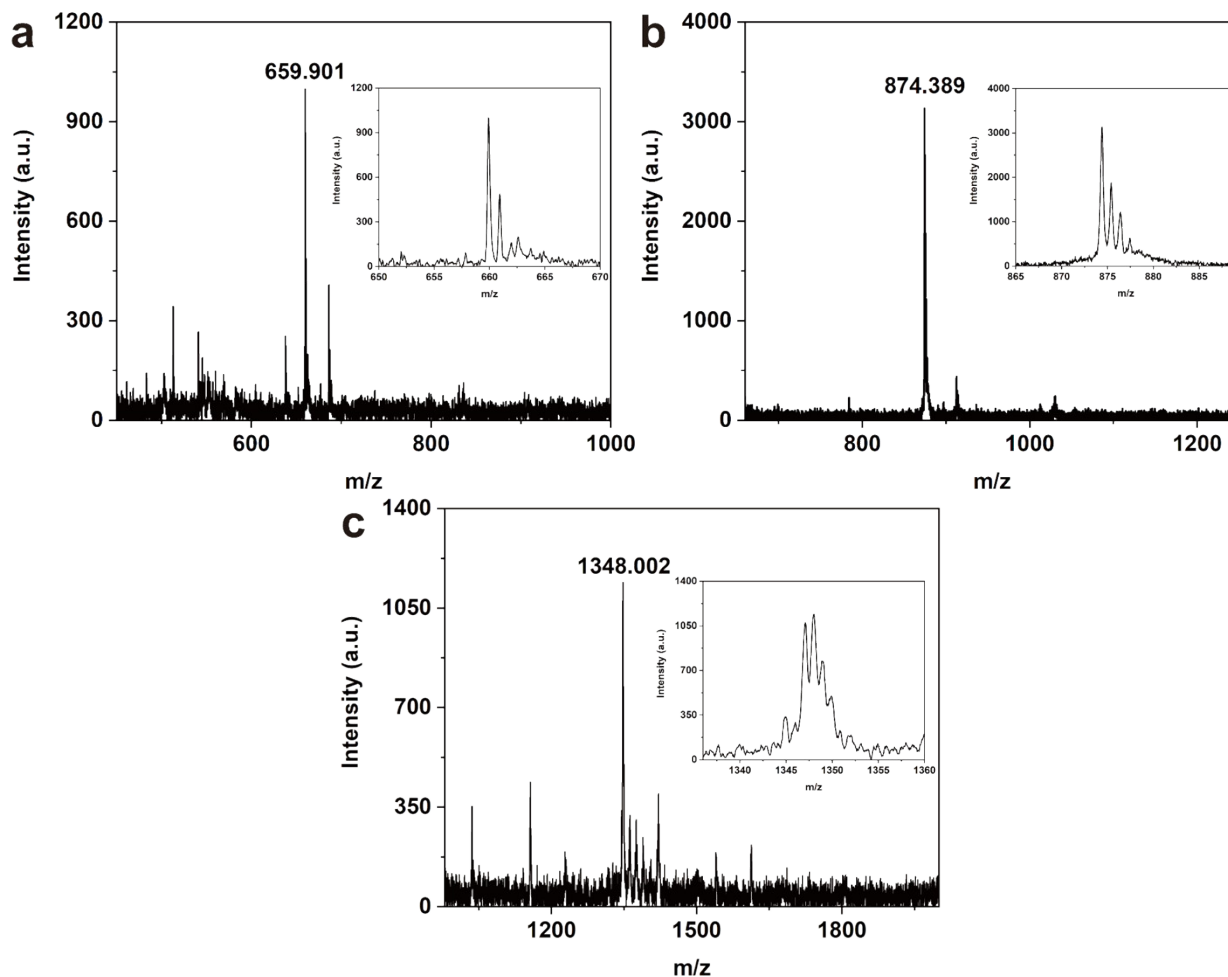

**Figure S1.** MALDI-TOF MS spectra of (a) PPCS, (b) PDCS and (c) PFCS.

**Table S1.** Detailed features of products obtained by MALDI-TOF MS.

| Sample | m/z [Da]                      | m <sup>a)</sup> | n <sup>a)</sup> | Chemical formula <sup>a)</sup>                    |
|--------|-------------------------------|-----------------|-----------------|---------------------------------------------------|
| PPCS   | 659.901 [M + K] <sup>+</sup>  | 8               | 2               | Si <sub>8</sub> C <sub>28</sub> H <sub>58</sub>   |
| PDCS   | 874.389 [M + Na] <sup>+</sup> | 12              | 1               | Si <sub>12</sub> C <sub>36</sub> H <sub>82</sub>  |
| PFCS   | 1348.002 [M + K] <sup>+</sup> | 14              | 3               | Si <sub>14</sub> C <sub>67</sub> H <sub>110</sub> |

<sup>a)</sup> Estimated from MALDI-TOF MS spectra as depicted in Figure S1.

## 2 Photophysical properties

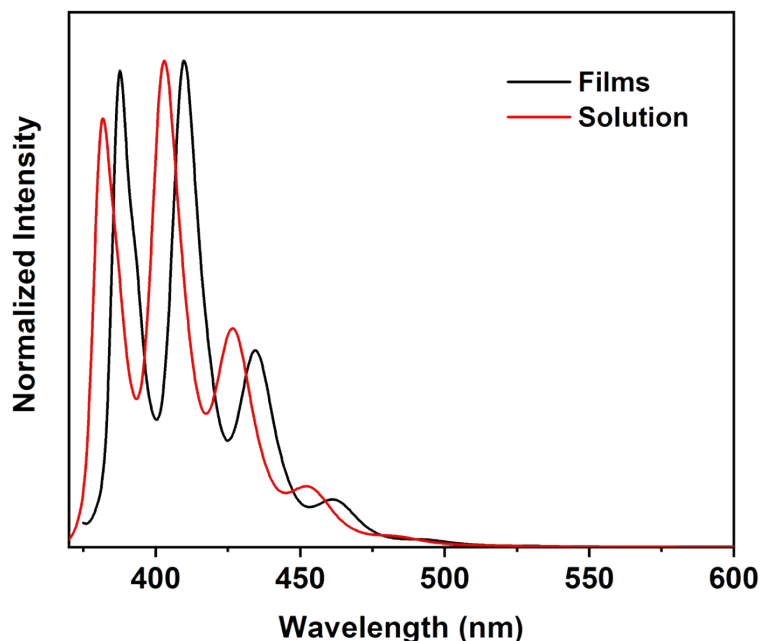

**Figure S2.** PL spectra of reference monomer (fluorene) films and solution.

Fluorene monomer solution was made by THF ( $10^{-6}$ - $10^{-5}$  mol·L<sup>-1</sup>) and its monomer films were prepared by spin-coating with THF as solvent ( $15$ - $20$  mg·mL<sup>-1</sup>) at 2100 rpm for 30 s. Their emission characterization was performed and the results were shown in Figure S2. PL spectrum of fluorene in solution state exhibits multiple peaks at about 382 nm, 403 nm, 427 nm and 452 nm. For fluorene in film state, multiple peaks at about 388 nm, 410 nm, 434 nm and 461 nm generate bathochromic shift owing to the aggregation among monomer molecules. The  $S_1$ - $S_0$  energy gap ( $\Delta E_{S_1 \rightarrow S_0}$ )<sup>3</sup> of fluorene monomer and PFCS films are calculated to be 3.20 eV and 3.02 eV respectively. In addition, absolute photoluminescence quantum yield (PLQY) of phenyl, diphenyl and fluorene core groups with intermolecular interactions is about 5%, 23% and 72%, respectively<sup>4-6</sup>. Indeed, PFCS products possess improved photophysical properties including red-shifted peaks, low energy gap, extended conjugation and enhanced blue emission in comparison with fluorene monomer, which are beneficial to practical applications.

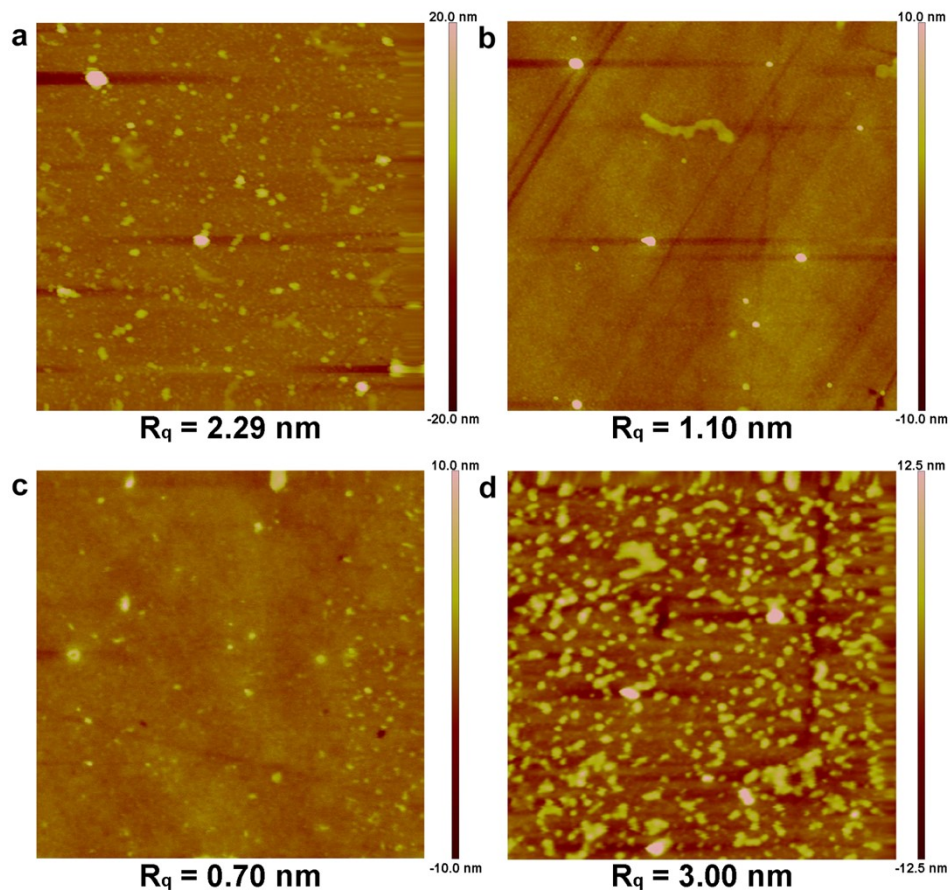

**Figure S3.** AFM height images ( $2\ \mu\text{m} \times 2\ \mu\text{m}$ ) of (a) PPCS, (b) PDCS, (c) PFCS and (d) monomer fluorene spin-coated onto quartz glasses.

**Table S2.** Fluorescence lifetime data of PPCS, PDCS and PFCS.

| Sample        | $\tau_1/\text{ns}$ [Rel%, $\eta_1$ ] | $\tau_2/\text{ns}$ [Rel%, $\eta_2$ ] | $\tau/\text{ns}$ |
|---------------|--------------------------------------|--------------------------------------|------------------|
| PPCS films    | 0.37 (51.09%)                        | 1.99 (48.91%)                        | 1.16             |
| PDCS films    | 0.38 (63.20%)                        | 1.85 (36.80%)                        | 0.92             |
| PFCS films    | 0.27 (61.45%)                        | 1.57 (38.55%)                        | 0.77             |
| PPCS solution | 1.97                                 | –                                    | 1.97             |
| PDCS solution | 3.04                                 | –                                    | 3.04             |
| PFCS solution | 0.73                                 | –                                    | 0.73             |

To gain an idea about the rate of relaxation in the excited state, the radiative ( $k_r$ ) and non-radiative ( $k_{nr}$ ) rate constants have been calculated using following two equations<sup>1,2</sup>:

$$k_r = \frac{\Phi_{PL}}{\tau} \#(1)$$

$$k_{nr} = \frac{1 - \Phi_{PL}}{\tau} \#(2)$$

where  $\Phi_{PL}$  is the emission yield and  $\tau$  is the fluorescence lifetime value for the polymer.

**Table S3.** Photophysical properties of PPCS, PDCS and PFCS.

| Sample | $\Phi_{PL}$ | $\tau_f^a$ [ns] | $k_{rf}^b$ [ $s^{-1}$ ] | $k_{nrf}^c$ [ $s^{-1}$ ] | $\tau_s^d$ [ns] | $k_{rs}^e$ [ $s^{-1}$ ] | $k_{nrs}^f$ [ $s^{-1}$ ] |
|--------|-------------|-----------------|-------------------------|--------------------------|-----------------|-------------------------|--------------------------|
| PPCS   | 64.26%      | 1.97            | $3.262 \times 10_8$     | $1.814 \times 10_8$      | 1.16            | $5.540 \times 10_8$     | $3.081 \times 10_8$      |
| PDCS   | 66.63%      | 3.04            | $2.192 \times 10_8$     | $1.098 \times 10_8$      | 0.92            | $7.242 \times 10_8$     | $3.627 \times 10_8$      |
| PFCS   | 89.75%      | 0.73            | $1.229 \times 10_9$     | $1.404 \times 10_8$      | 0.77            | $1.166 \times 10_9$     | $1.331 \times 10_8$      |

<sup>a)</sup> Fluorescence decay lifetime of films ( $\tau_f$ ); <sup>b)</sup> The radiative rate constants of films ( $k_{rf}$ ); <sup>c)</sup> The non-radiative rate constants of films ( $k_{nrf}$ ); <sup>d)</sup> Fluorescence decay lifetime of solutions ( $\tau_s$ ); <sup>e)</sup> The radiative rate constants of solutions ( $k_{rs}$ ); <sup>f)</sup> The non-radiative rate constants of solutions ( $k_{nrs}$ ).

### 3 Electrochemical properties

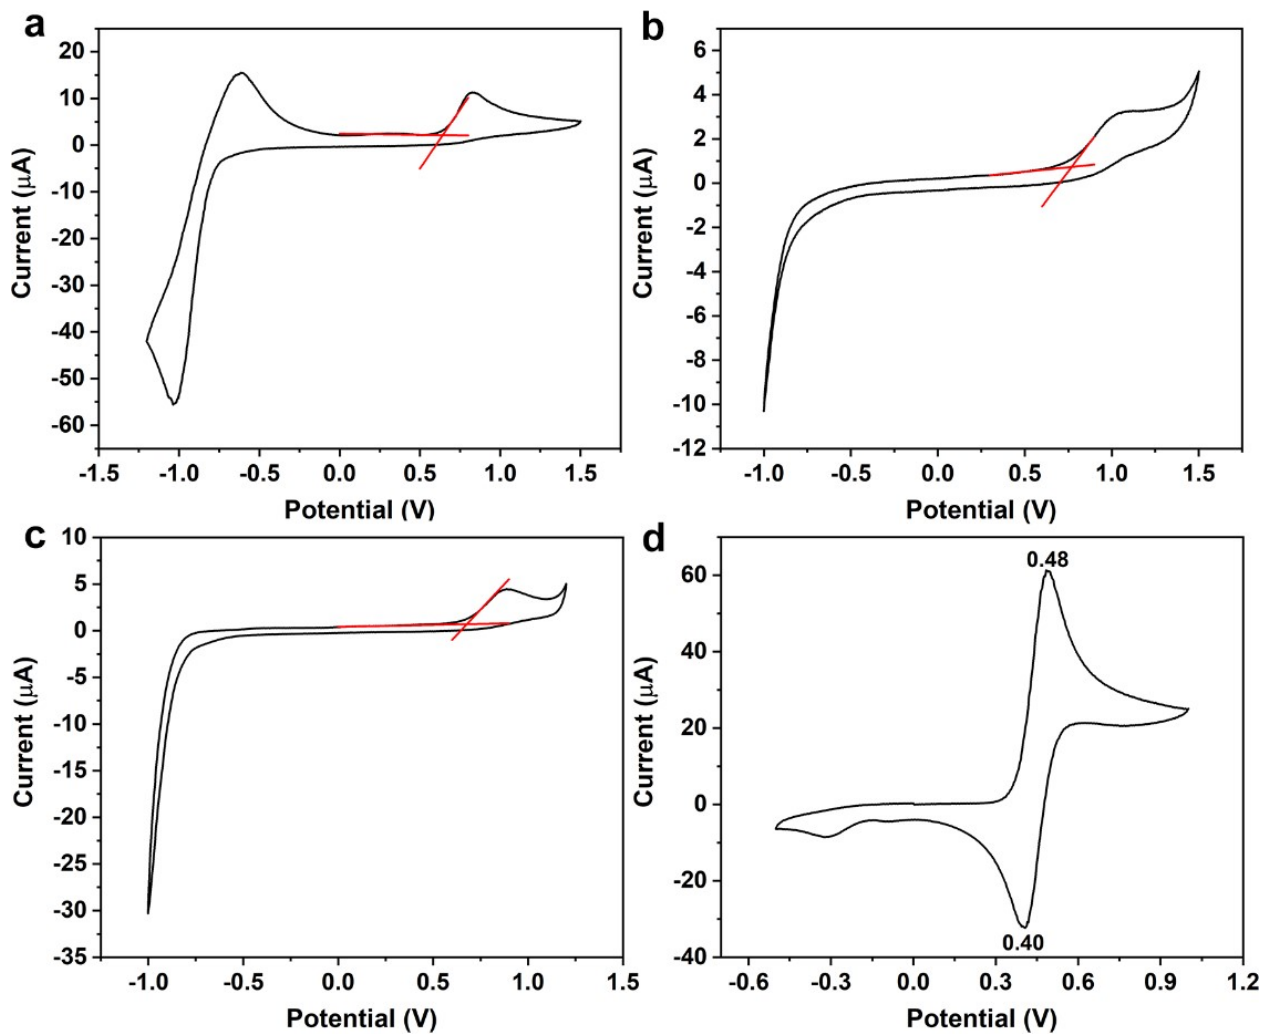

**Figure S4.** Cyclic voltammograms for the oxidation of (a) PPCS, (b) PDCS and (c) PFCS; (d) Redox potential of ferrocene (0.1 mmol) in tetrabutylammonium hexafluorophosphate ( $0.1 \text{ mol}\cdot\text{L}^{-1}$ ) acetonitrile solution.

## References

- 1 J. V. Caspar and T. J. Meyer, *J. Phys. Chem.*, 1983, **87**, 952–957.
- 2 J. K. Rice, E. D. Niemeyer and F. V Bright, *J. Phys. Chem.*, 1996, **100**, 8499–8507.
- 3 X. Wang, H. Shi, H. Ma, W. Ye, L. Song, J. Zan, X. Yao, X. Ou, G. Yang, Z. Zhao, M. Singh, C. Lin, H. Wang, W. Jia, Q. Wang, J. Zhi, C. Dong, X. Jiang, Y. Tang, X. Xie, Y. Yang, J. Wang, Q. Chen, Y. Wang, H. Yang, G. Zhang, Z. An, X. Liu and W. Huang, *Nat. Photonics*, 2021, **15**, 187–192.
- 4 D. Liu, J. De, H. Gao, S. Ma, Q. Ou, S. Li, Z. Qin, H. Dong, Q. Liao, B. Xu, Q. Peng, Z. Shuai, W. Tian, H. Fu, X. Zhang, Y. Zhen and W. Hu, *J. Am. Chem. Soc.*, 2020, **142**, 6332–6339.
- 5 S. Kim, B. Kim, J. Lee, H. Shin, Y.-I. Park and J. Park, *Mat. Sci. Eng. R*, 2016, **99**, 1–22.
- 6 A. M. Brouwer, *Pure Appl. Chem.*, 2011, **83**, 2213–2228.
